# Supplementary material for: Copy number polymorphisms near SLC2A9 are associated with serum uric acid concentrations
Source: PubMed Central journal article supplement (PMC4118309; doi:10.1186/1471-2156-15-81), 2014-07-09
Supplement: 1471-2156-15-81-S1.pdf [file 1471-2156-15-81-S1.pdf]

**Additional file 1: supplementary figures and table**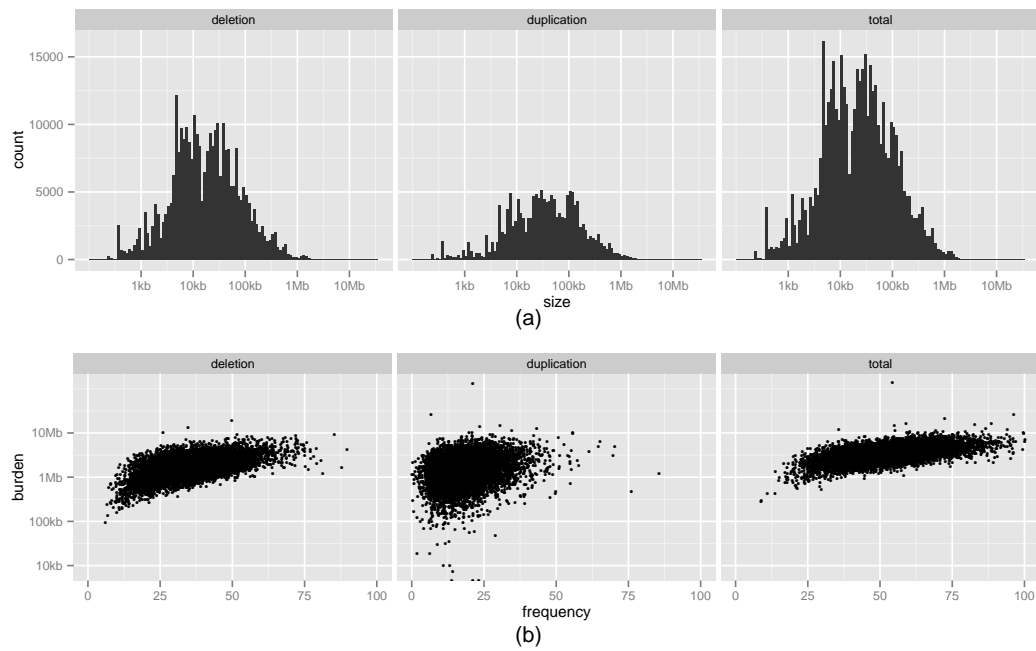

**Figure S1** Size, frequency and burden of CNVs among ARIC participants of European ancestry. CNVs were estimated using the VI algorithm. (Top): Size of CNVs stratified by qualitative categories of copy number loss or gain. (Bottom) Frequency of CNVs per individual plotted against the total number of basepairs in CNVs (burden).



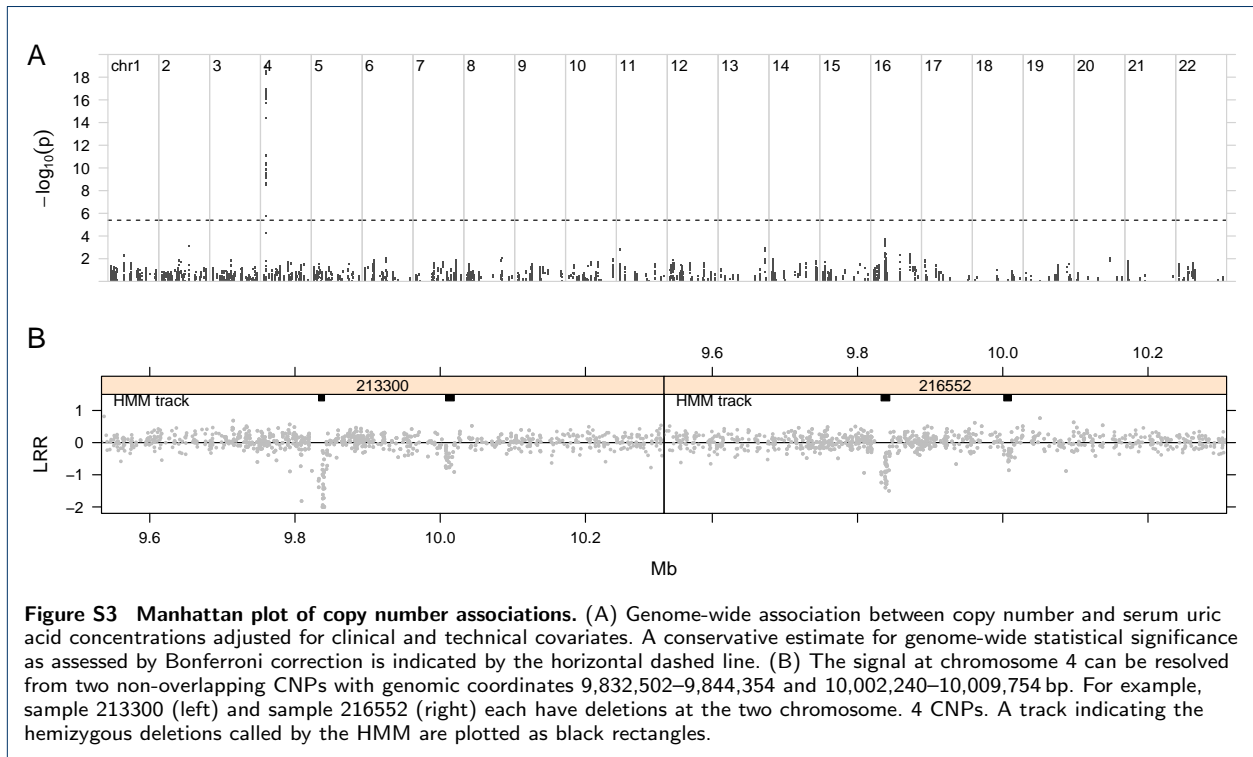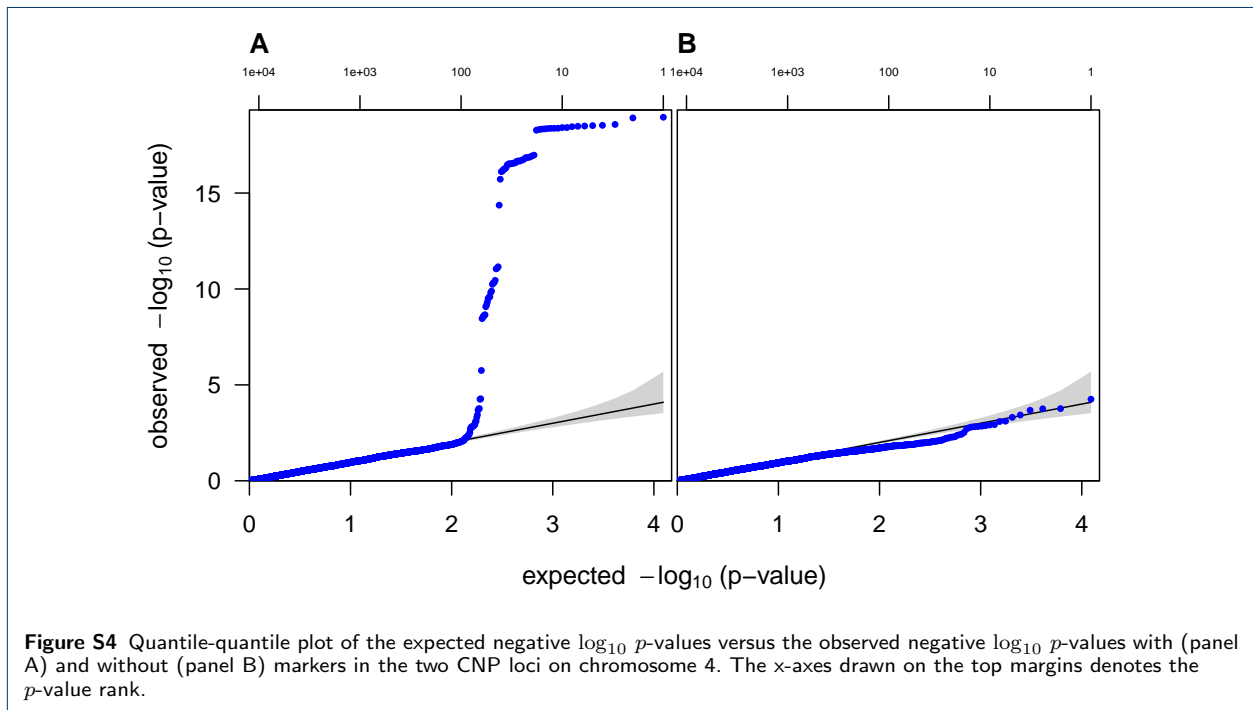

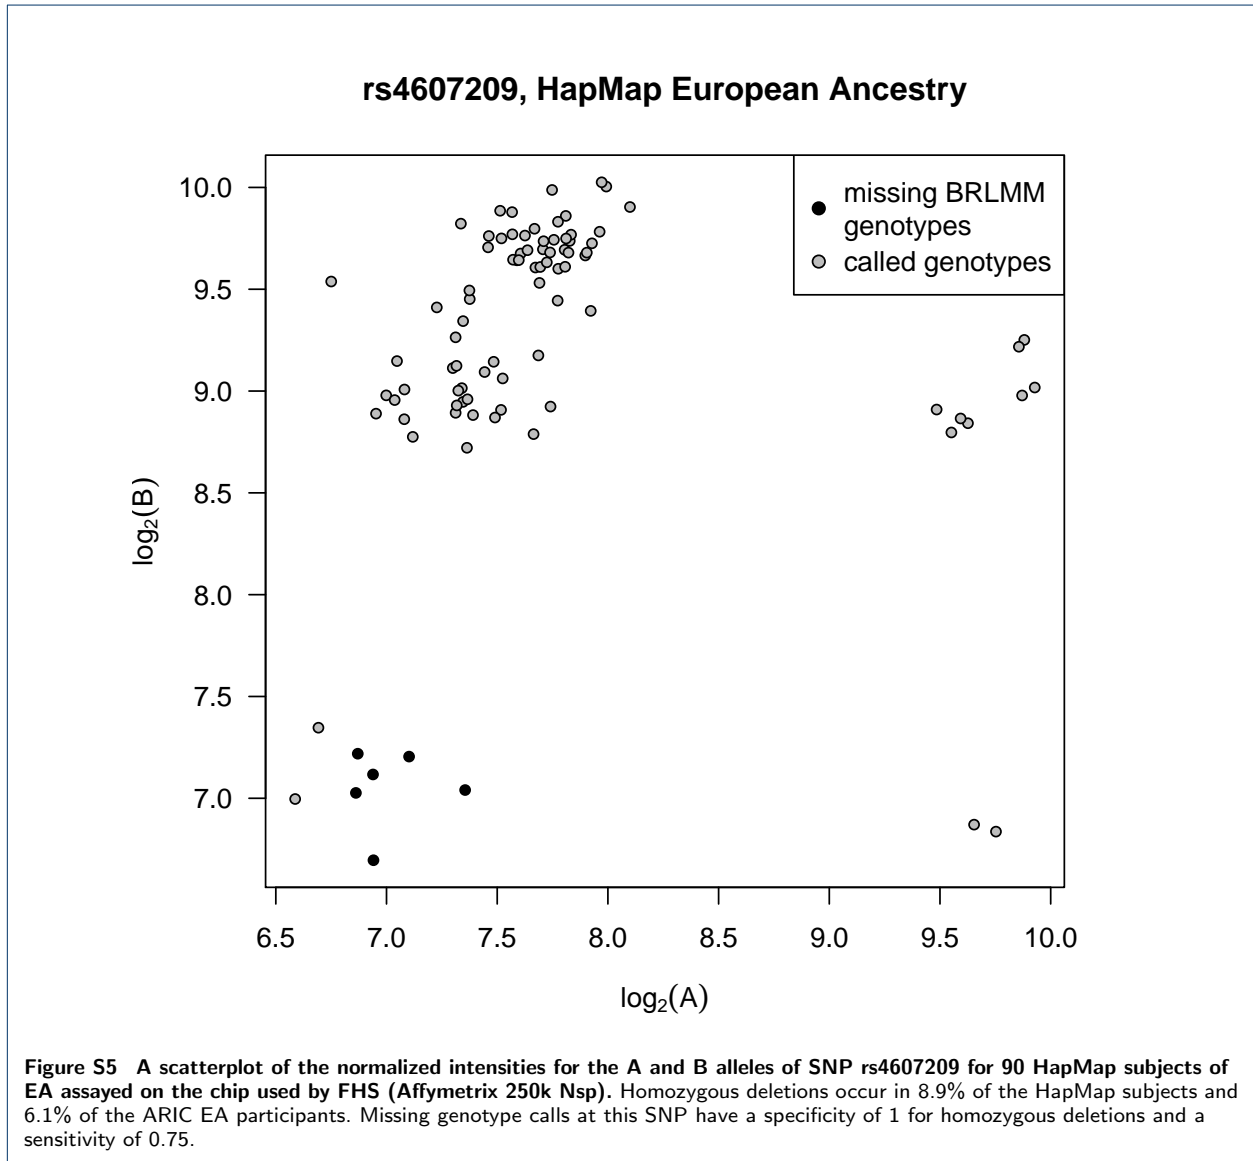

## Supplementary Tables

|                    | overall (IQR)     | deletions (IQR)   | duplications (IQR) |
|--------------------|-------------------|-------------------|--------------------|
| size [kb]          | 22 (18, 27)       | 22 (18, 27)       | 36 (26, 51)        |
| bases altered [kb] | 3530 (2695, 4491) | 1701 (1191, 2433) | 1508 (903, 2332)   |
| frequency          | 55 (45, 64)       | 36 (28, 43)       | 17 (13, 23)        |
| number genes       | 45 (35, 55)       | 24 (18, 31)       | 24 (18, 31)        |

**Table S1** Median and interquartile range (IQR) descriptive statistics of autosomal CNVs identified in 8,411 EA participants. The number of genes is tabulated differently for deletions and duplications. For deletions, a gene is counted if any portion of the gene overlaps a deletion. For duplications, a gene is counted only if the entire transcript is spanned by an amplification.
